# Supplementary material for: Adjustment of photosynthetic activity to drought and fluctuating light in wheat
Source: PubMed Central journal article supplement (PMC7384038; doi:10.1111/pce.13756), 2020-03-27
Supplement: PCE-43-1484-s011.pdf [file PCE-43-1484-s011.pdf]

Table S2. Phosphorylated proteins detected by mass spectrometry in the United Kingdom (UK) and Iran (IR) wheat cultivars. Variations of the protein content and the corresponding phospho-peptide in UK and IR plants under drought stress, relative to the respective control plants (in percentage), are indicated in the columns 'UK DS' and 'IR DS' (mean and SD), respectively. The mean of 'UK DS' and 'IR DS' values is reported in the 'DS' columns. p-values refer to the control vs drought comparison by two-way ANOVA analysis (0.01 < p < 0.05 is marked by \*, 0.001 < p ≤ 0.01 by \*\*, p < 0.001 by \*\*\*). In the 'Phospho-site' column the position of the phosphorylated residue in the protein sequence is reported. The modification of the phosphorylation level was estimated by taking into account the relative changes in the amount of phospho-peptide and the corresponding protein.

| Uniprot ID | Protein annotation                              | Phospho-site | Protein |     |       |     |       |     | Phospho-peptide |     |       |     |       |
|------------|-------------------------------------------------|--------------|---------|-----|-------|-----|-------|-----|-----------------|-----|-------|-----|-------|
|            |                                                 |              | DS      |     | UK DS |     | IR DS |     | DS              |     | UK DS |     | IR DS |
|            |                                                 |              | mean    | SD  | mean  | SD  | mean  | SD  | mean            | SD  | mean  | SD  |       |
| P20858     | ATP synthase subunit beta (AtpB), chloroplastic | S496         | 3       | 10  | 21    | -7  | 10    | -10 | -24             | 26  | 5     | 29  |       |
| A0A1D6B4Q8 | Calcium sensing receptor, chloroplastic         | T368         | 24      | 20  | 24    | 32  | 8     | *   | -5              | -20 | 27    | 9   | 31    |
| A0A096UP27 | Cold induced 16                                 | S7           | 37      | 11  | 42    | 62  | 30    | *   | 27              | 106 | 213   | 20  | 319   |
|            |                                                 | S8           |         |     |       |     |       |     | 99              | 202 | 235   | 86  | 453   |
| A0A172WCB1 | Cold-responsive LEA/RAB-related COR protein     | S17          | -17     | -17 | 11    | -17 | 9     |     | -19             | -72 | 25    | -4  | 1910  |
| Q3S411     | Eukaryotic translation initiation factor 5A     | S2           | 9       | -18 | 18    | 13  | 33    |     | 7               | 346 | 331   | -42 | 59    |
|            |                                                 | T4           |         |     |       |     |       |     | -53             | -62 | 67    | -45 | 219   |
| W5BMK0     | Eukaryotic translation initiation factor 5A     | S2           | 22      | 23  | 97    | 22  | 54    |     | -1              | 3   |       | -4  | 148   |
|            |                                                 | S4           |         |     |       |     |       |     | 54              | 130 | 227   | -1  | 22    |
| A0A1D5S3M7 | Fructose-2,6-bisphosphatase                     | S278         | -22     | -29 | 7     | -12 | 12    | *** | 20              | 33  | 152   | 12  | 29    |

|            |                                                               |                |     |     |    |     |     |     |      |     |      |      |     |    |
|------------|---------------------------------------------------------------|----------------|-----|-----|----|-----|-----|-----|------|-----|------|------|-----|----|
| A0A0C4BK97 | Glycine cleavage<br>system H protein,<br>mitochondrial        | S141           | 68  |     |    | 68  | 244 |     | 14   | 40  | 75   | 11   | 551 |    |
| A0A1D5YQA8 | HMG-I/Y protein<br>HMGa                                       | S167           | 14  | 2   | 30 | 23  | 14  |     | -73  | -84 | 10   | 22   | 43  |    |
| Q8LRU5     | HMG-Y-related<br>protein A                                    | S167           | 13  | -18 | 30 | 30  | 28  |     | -9   | -8  | 128  | -11  | 22  |    |
| A0A1D6CET4 | Kinesin-like protein<br>KIN-14L                               | S1062          | -5  | -19 | 17 | 16  | 11  |     | 5    | -4  |      | 8    | 112 |    |
| A0A1D5XSR5 | Phosphoglucomutase,<br>cytoplasmic                            | S180<br>T188   | 9   | 3   | 10 | 19  | 7   |     | 16   | 47  | 82   | 6    | 87  |    |
| A0A1D6RID7 | Photosystem II<br>subunit O (PsbO),<br>chloroplastic          | T110, S275     | 1   | 5   | 12 | -1  | 13  |     | -49  | -56 | 68   | -43  | 29  |    |
| P69555     | Photosystem II<br>subunit H (PsbH),<br>chloroplastic          | T3<br>T5       | -7  |     |    | -7  | 26  |     | 27   | 7   | 88   | 45   | 68  |    |
| A0A1D5UI03 | Phototropin-2                                                 | S493           | 0   | 13  | 23 | -7  | 13  |     | -18  | -20 | 30   | -17  | 98  |    |
| A0A1D5ZWZ5 | Plastid movement<br>impaired1;expressed<br>protein            | S100           | -7  | -16 | 25 | 3   | 25  |     | 31   | 75  | 206  | 11   | 29  |    |
| A0A1D6D8M0 | Pyruvate, phosphate<br>dikinase 1,<br>chloroplastic           | T464           | 20  | 12  | 12 | 35  | 22  | *   | 1446 | 893 | 1705 | 3406 | 241 |    |
| A0A1D5UR24 | Ribose 5-phosphate<br>isomerase, type A<br>protein            | S6             | -45 | -45 | 17 | -46 | 9   | *** | -17  | -38 | 20   | 695  | 86  |    |
| W5D591     | Small ubiquitin-related<br>modifier                           | S2             | 19  | 27  | 22 | 15  | 11  | **  | 2    | 43  | 50   | -11  | 81  |    |
| A0A1D6B773 | Tetratricopeptide<br>repeat (TPR)-like<br>superfamily protein | S1327<br>S1298 | -40 | -48 | 29 | -28 | 30  | **  | 1370 | 452 | 1123 | 2444 | 953 |    |
|            |                                                               |                |     |     |    |     |     |     | -51  | -61 | 13   | -37  | 14  | ** |
